# Supplementary material for: Transformation of ZIF-8 nanoparticles into 3D nitrogen-doped hierarchically porous carbon for Li–S batteries
Source: Royal Society of Chemistry journal article supplement (doi:10.1039/c9ra10063f), 2020-01-01
Supplement: c9ra10063f1.pdf [file c9ra10063f1.pdf]

## Supporting Information

### Transformation of ZIF-8 Nanoparticles into 3D Nitrogen-Doped Hierarchically

### Porous Carbon for Li-S Batteries

Guiqiang Cao,<sup>a</sup> Da Bi,<sup>a</sup> Jingxiang Zhao,<sup>b</sup> Jing Zheng,<sup>c</sup> Zhikang Wang,<sup>a</sup> Qingxue Lai<sup>\*,a</sup>, and Yanyu Liang<sup>\*,a</sup>

<sup>a</sup>College of Materials Science and Technology, Nanjing University of Aeronautics and Astronautics, Nanjing 210016, P. R. China.

<sup>b</sup> College of Chemistry and Chemical Engineering, and Key Laboratory of Photonic and Electronic Bandgap Materials, Ministry of Education, Harbin Normal University, Harbin, 150025, China

<sup>c</sup> Department of Chemistry and Materials Science, College of Science, Nanjing Forestry University, Nanjing 210037, China.

\*Corresponding authors: laiqingxue@126.com; liangyy403@126.com

## Contents

### Models and Methods

Figure S1. XRD pattern of ZIF-8/PVP and NHPC and SEM image of ZIF-8/PVP.

Figure S2. SEM image of NHPC with a ZIF-8/PVP ratio of a) 1:1, b) 1:2, c) 1:3 and corresponding TEM image d), e), f), respectively.

Figure S3. a-b) Pore distribution of NHPC and NHPC/NH<sub>3</sub>, c) XPS study of NHPC and NHPC/NH<sub>3</sub>, d) TG curves of S@NHPC and NHPC and Pure S.

Figure S4. SEM image of S@NHPC/NH<sub>3</sub>.

Figure S5. Nitrogen adsorption/desorption isotherm and pore size distributions of the S@NHPC/NH<sub>3</sub>.

Figure S6. a) Cyclic voltammetry of the S@NHPC cathode. b) Charge/discharge profiles of the S@NHPC and the S@NHPC/NH<sub>3</sub> cathodes at 400 mA g<sup>-1</sup>.

Figure S7. SEM image of S@NHPC.

Figure S8. Electrochemical impedance spectra of S@NHPC/NH<sub>3</sub> cathodes before cycle and after cycle at 200 mA g<sup>-1</sup>.

Figure S9. The image of a Li<sub>2</sub>S<sub>6</sub> solution before (0) and after the addition of NHPC (1) and NHPC/NH<sub>3</sub> (2) for 3 h.

## Models and Methods

All the calculations were performed by using the spin-polarized DFT methods implemented in the Vienna Ab Initio Simulation Package (VASP).<sup>1</sup> The exchange correlation energy was represented by the Perdew-Burke-Ernzerhof (PBE) functional within the generalized gradient approximation (GGA).<sup>2</sup> The electron-ion interactions were described by the projector augmented wave (PAW) method.<sup>3</sup> A Monkhorst-Pack k-point mesh of  $5 \times 5 \times 1$  was used to sample the Brillouin zone and the plane-wave cut-off energy was set to be 500 eV. To accurately determine the van der Waals (vdW) interactions in these layered systems, the DFT-D3 method with Grimme's scheme was employed.<sup>4</sup> All structures were fully relaxed until the forces on each atom were less than  $0.02 \text{ eV \AA}^{-1}$  and the convergence criterion for the electronic structure iteration was set to be  $10^{-5} \text{ eV}$ . The vacuum space was set to be  $20 \text{ \AA}$  in the z direction, which was large enough to minimize the interaction between periodic images.

To model these N-doped graphenes, we used a supercell consisting of  $5 \times 5$  graphene unit cells. The binding energy ( $E_b$ ) of soluble  $\text{Li}_2\text{S}_6$  species on the anchoring materials (AM) was determined by:  $E_b = (E_{\text{Li}_2\text{S}_6} + E_{\text{AM}}) - E_{\text{Li}_2\text{S}_6\text{-AM}}$ , where  $E_{\text{Li}_2\text{S}_6}$ ,  $E_{\text{AM}}$ , and  $E_{\text{Li}_2\text{S}_6\text{-AM}}$  represent the total electronic energies of isolated  $\text{Li}_2\text{S}_6$  cluster, pristine AM, and the adsorbed  $\text{Li}_2\text{S}_6$  systems, respectively. According to this definition, a more positive binding energy indicates a stronger binding strength of soluble  $\text{Li}_2\text{S}_n$  species on the anchoring materials.

## Figure Captions in Supporting Information

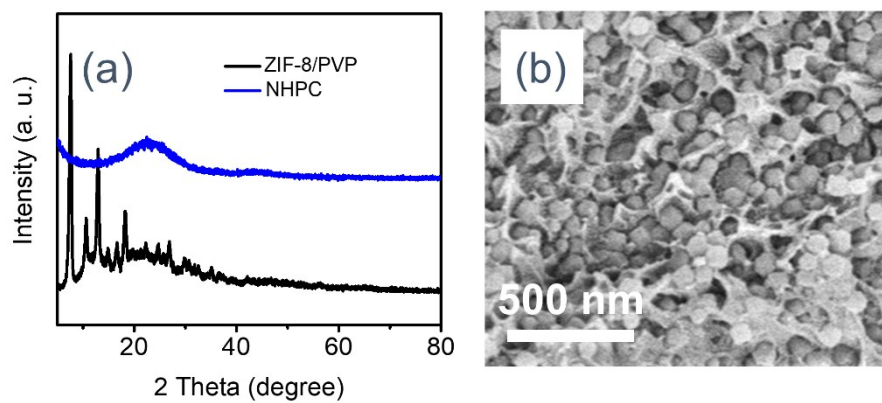

**Figure S1.** XRD pattern of ZIF-8/PVP and NHPC and SEM image of ZIF-8/PVP.

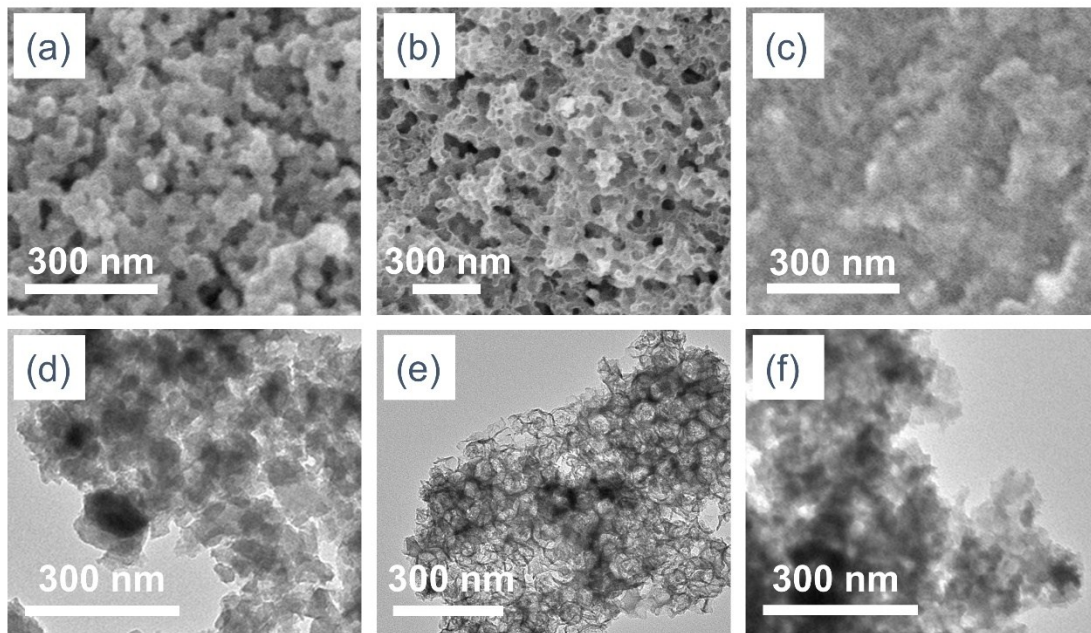

**Figure S2.** SEM image of NHPC with a ZIF-8/PVP ratio of a) 1:1, b) 1:2, c) 1:3 and corresponding TEM image d), e), f), respectively.

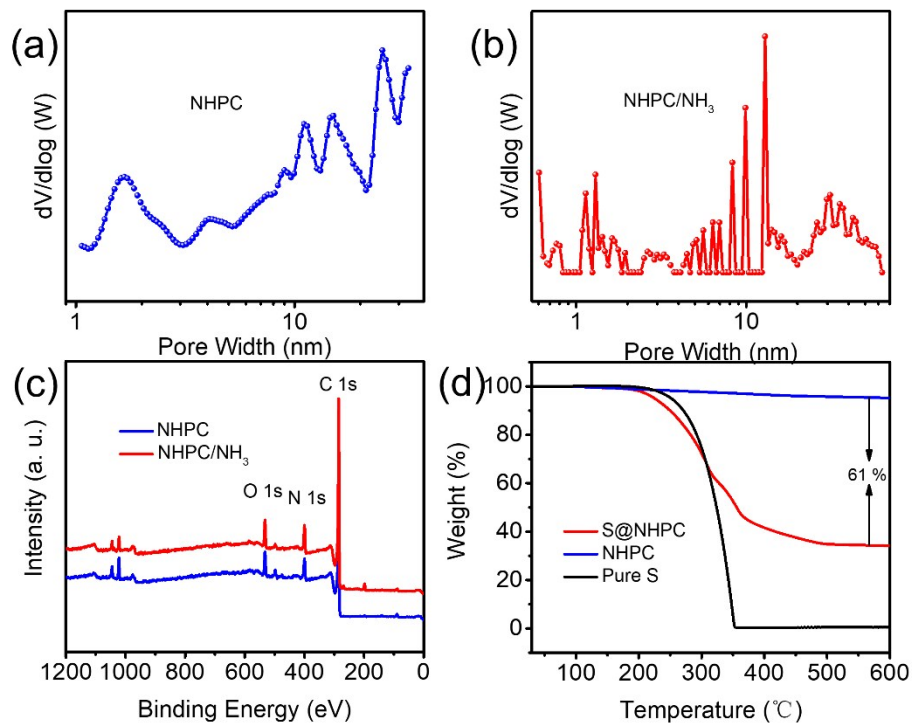

**Figure S3.** a-b) Pore distribution of NHPC and NHPC/NH<sub>3</sub>, c) XPS study of NHPC and NHPC/NH<sub>3</sub>, d) TG curves of S@NHPC and NHPC and Pure S.

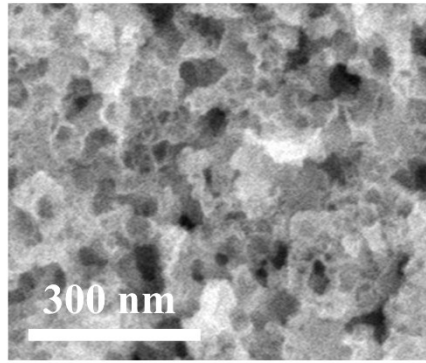

**Figure S4.** SEM image of S@NHPC/NH<sub>3</sub>.

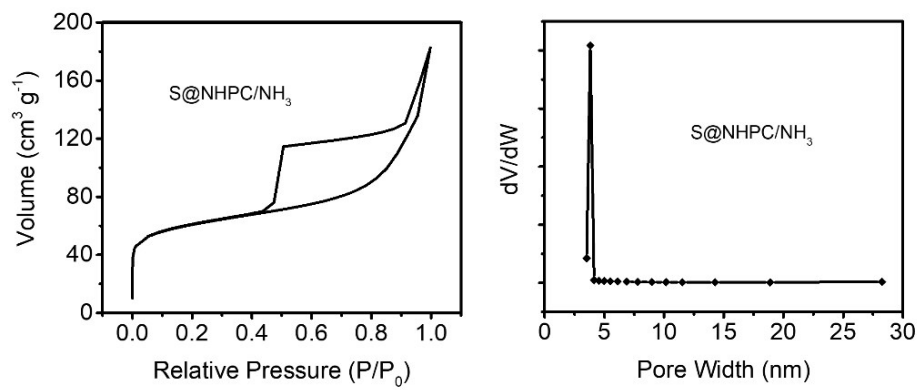

**Figure S5.** Nitrogen adsorption/desorption isotherm and pore size distributions of the S@NHPC/NH<sub>3</sub>.



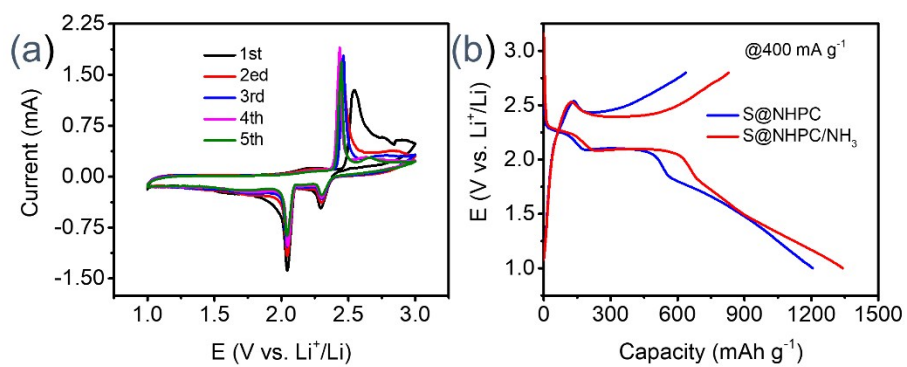

**Figure S6.** a) Cyclic voltammetry of the S@NHPC cathode. b) Charge/discharge profiles of the S@NHPC and the S@NHPC/NH<sub>3</sub> cathodes at 400 mA g<sup>-1</sup>.

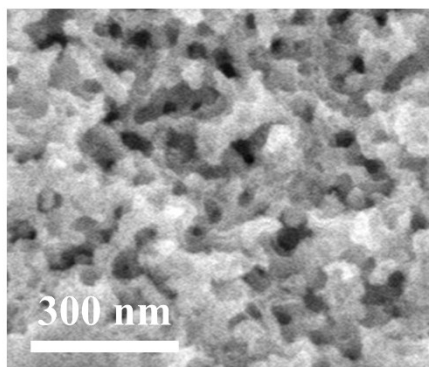

**Figure S7.** SEM image of S@NHPC.

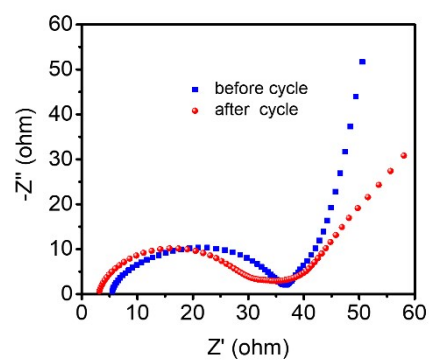

**Figure S8.** Electrochemical impedance spectra of S@NHPC/NH<sub>3</sub> cathodes before cycle and after cycle at 200 mA g<sup>-1</sup>.

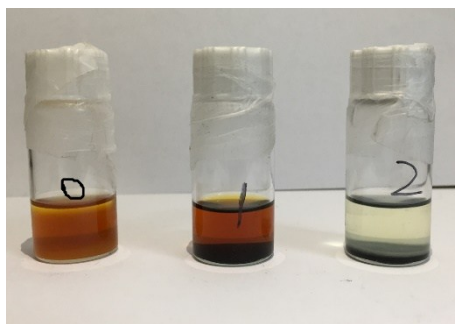

**Figure S9.** The image of a  $\text{Li}_2\text{S}_6$  solution before (0) and after the addition of NHPC (1) and NHPC/ $\text{NH}_3$  (2) for 3 h.

## References in Supporting Information

- [1] G. Kresse and J. Furthmüller, *Physical Review B*, 1996, 54, 11169-11186.
- [2] J. P. Perdew, K. Burke and M. Ernzerhof, *Physical Review Letters*, 1996, 77, 3865-3868.
- [3] P. E. Blöchl, *Physical Review B*, 1994, 50, 17953-17979.
- [4] S. Grimme, J. Antony, S. Ehrlich and H. Krieg, *Journal of Chemical Physics*, 2010, 132, 154104.
